# Supplementary material
Source: Springer Nature journal article supplement (https://www.springermedizin.de/resource/supplementary/12865_2006_93_MOESM2_ESM.pdf/9428562)

**A****Gag**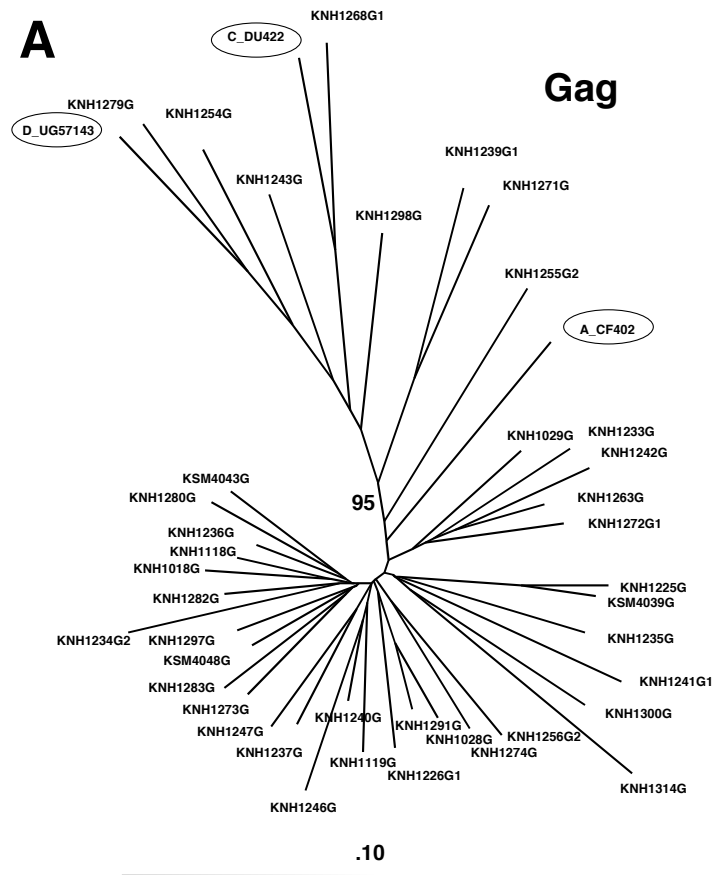**B****Nef**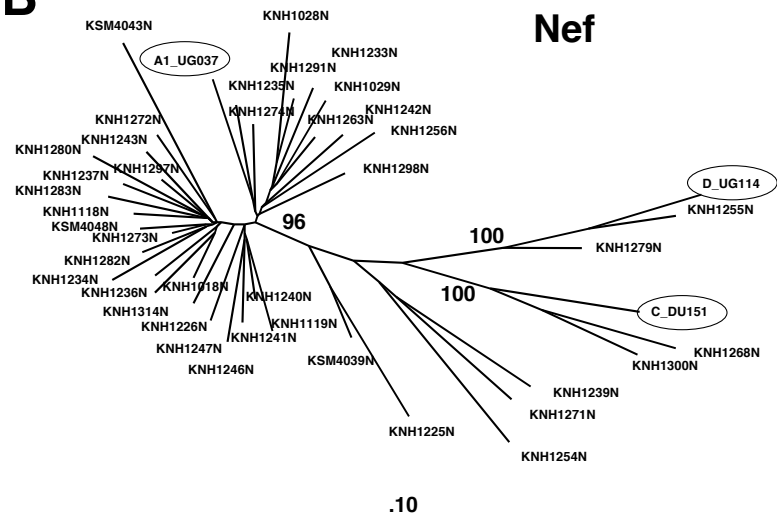

Supplement: MOESM2 [file 9428562]
